# Supplementary material for: Anti-Inflammatory Effects of Metformin Irrespective of Diabetes Status
Source: PubMed Central journal article supplement (PMC4990459; doi:10.1161/circresaha.116.308445), 2016-08-18
Supplement: res-119-652-s001.pdf [file res-119-652-s001.pdf]

## Circulation Research

---

**From:** Ritu Sharma (Staff) <R.S.Sharma@dundee.ac.uk>  
**Sent:** Monday, July 11, 2016 5:24 AM  
**To:** circulation.research@circresearch.com  
**Cc:** Amy Cameron (Staff)  
**Subject:** CIRCRES/2016/308445R2 :Permission of Acknowledgement

Hi

I write here to confirm that I am happy with my name cited in acknowledgements for assisting in setting up of RT-PCR, for the manuscript in reference:

**CIRCRES/2016/308445R2:** Anti-inflammatory effects of metformin irrespective of diabetes status.

Please let me know if you need any further information.

Many thanks & kind regards

Ritu

Dr Ritu S Sharma  
Prof. John Hayes Lab  
Division of Cancer Research,  
School of Medicine  
Jacqui Wood Cancer Centre, University of Dundee  
James Arrott Drive, Ninewells Hospital And Medical School  
Dundee DD1 9SY Scotland

---

**From:** Amy Cameron (Staff)  
**Sent:** 07 July 2016 09:57  
**To:** Andrew Cassidy (Staff); Ritu Sharma (Staff)  
**Cc:** Graham Rena (Staff)  
**Subject:** Permission of Acknowledgement

Dear Ritu and Andy

Our recently submitted manuscript to Circulation Research is on the cusp of being accepted. Prior to this acceptance the journal has requested that anyone we have acknowledged by name must cite their permission to be acknowledged directly to the journal. I would really appreciate if you could send an email to [circulation.research@circresearch.com](mailto:circulation.research@circresearch.com) stating you are happy with this. The reference for the manuscript is CIRCRES/2016/308445R2: Anti-inflammatory effects of metformin irrespective of diabetes status. You have been acknowledged as follows: In addition, Dr Andy Cassidy and Dr Ritu Sharma (both Dundee) assisted set-up of RT-PCR.

Thanks.

Amy

Dr Amy Cameron

## Circulation Research

---

**From:** Andrew Cassidy (Staff) <a.j.cassidy@dundee.ac.uk>  
**Sent:** Thursday, July 07, 2016 7:59 AM  
**To:** circulation.research@circresearch.com  
**Cc:** Amy Cameron (Staff)  
**Subject:** Acknowledgement

Dear Circulation Research,

I am happy with this acknowledgement, thank you.

The reference for the manuscript is CIRCRES/2016/308445R2: Anti-inflammatory effects of metformin irrespective of diabetes status. You have been acknowledged as follows: In addition, Dr Andy Cassidy and Dr Ritu Sharma (both Dundee) assisted set-up of RT-PCR.

Kindest regards

-----  
Dr Andrew Cassidy  
The Tayside Centre for Genomic Analysis  
University of Dundee  
School of Medicine, Level 6  
Ninewells Hospital and Medical School  
DD1 9SY  
Phone (Office): 01382 383268  
Phone (Mobile) 07794578063  
E-Mail: a.j.cassidy@dundee.ac.uk  
Web: <http://www.tcga.org.uk>  
-----

The University of Dundee is a registered Scottish Charity, No: SC015096

## Circulation Research

---

**From:** Patel, Kashyap <K.A.Patel@exeter.ac.uk>  
**Sent:** Thursday, July 07, 2016 7:30 AM  
**To:** circulation.research@circresearch.com  
**Cc:** g.rena@dundee.ac.uk  
**Subject:** Fwd: Permission of Acknowledgement

Dear Sir / Madam

I am happy for my acknowledgement in the following manuscript

CIRCRES/2016/308445R2: Anti-inflammatory effects of metformin irrespective of diabetes status

Best wishes

Kash

Sent from my iPhone

Begin forwarded message:

**From:** "Amy Cameron (Staff)" <[A.X.Cameron@dundee.ac.uk](mailto:A.X.Cameron@dundee.ac.uk)>  
**Date:** 7 July 2016 at 04:48:03 GMT-4  
**To:** "'[k.a.patel@exeter.ac.uk](mailto:k.a.patel@exeter.ac.uk)'" <[k.a.patel@exeter.ac.uk](mailto:k.a.patel@exeter.ac.uk)>  
**Cc:** "Graham Rena (Staff)" <[g.rena@dundee.ac.uk](mailto:g.rena@dundee.ac.uk)>  
**Subject:** **Permission of Acknowledgement**

Dear Kash

Our recently submitted manuscript to Circulation Research is on the cusp of being accepted. Prior to this acceptance the journal has requested that anyone we have acknowledged by name must cite their permission to be acknowledged directly to the journal. I would really appreciate if you could send an email to [circulation.research@circresearch.com](mailto:circulation.research@circresearch.com) stating you are happy with this. The reference for the manuscript is CIRCRES/2016/308445R2: Anti-inflammatory effects of metformin irrespective of diabetes status. You have been acknowledged as follows: We thank Dr Kashyap Patel (Exeter) for demonstrating hepatocyte extraction.

Thanks.

Amy

Dr Amy Cameron  
Division of Molecular & Clinical Medicine (Level 5)  
Mailbox 12  
School of Medicine  
Ninewells Hospital & Medical School  
University of Dundee
